# Supplementary material for: Application of Aluminum Hydroxide for Improvement of Label-Free SERS Detection of Some Cephalosporin Antibiotics in Urine
Source: MDPI journal article supplement (doi:10.3390/bios9030091), 2019-07-23
Supplement: s1 [file s1]

# Application of Aluminum Hydroxide for Improvement of Label-Free SERS Detection of Some Cephalosporin Antibiotics in Urine

Natalia E. Markina, Alexey V. Markin\*

Saratov State University, Astrakhanskaya 83, 410012 Saratov, Russia

\* Correspondence: av\_markin@mail.ru

**Table 1.** Chemical structures of the analytes (cephalosporins):.

| Analyte | R <sub>1</sub> – | – R <sub>2</sub> | Generation | Molecular weight, g/mol |
|---------|------------------|------------------|------------|-------------------------|
| CZL     |                  |                  | 1          | 454.5                   |
| CRX     |                  |                  | 2          | 424                     |
| CPR     |                  |                  | 3          | 646                     |
| CTX     |                  |                  | 3          | 455.5                   |

|     |                                                                             |   |       |
|-----|-----------------------------------------------------------------------------|---|-------|
| CTR | <chem>CN1C=NC2=C1C(=O)N(C)C2=O</chem> <chem>CN1C=NC2=C1C(=O)N(C)C2=O</chem> | 3 | 554.5 |
|-----|-----------------------------------------------------------------------------|---|-------|

**Table S2.** Description of the Raman spectrometer used in the study.

| Detail               | Description                                                                        |
|----------------------|------------------------------------------------------------------------------------|
| Spectrometer         | QEPro                                                                              |
| Diffraction gratings | 1200 g/mm (Grating H35)                                                            |
| Raman shift range    | 150–3100 cm <sup>-1</sup>                                                          |
| Slit                 | 100 μm                                                                             |
| Laser                | 638 nm<br>18 mW (power at the sample)<br>(Laser-638-LAB-FCA)                       |
| Raman probe          | FC excitation and SMA 905 collection<br>(RIP-RPB-638-SMA-SMA)                      |
| Holder               | Universal for Raman, fluorescence,<br>and absorbance measurements (OOA-HOLDER-RFA) |
| Software             | OceanView                                                                          |

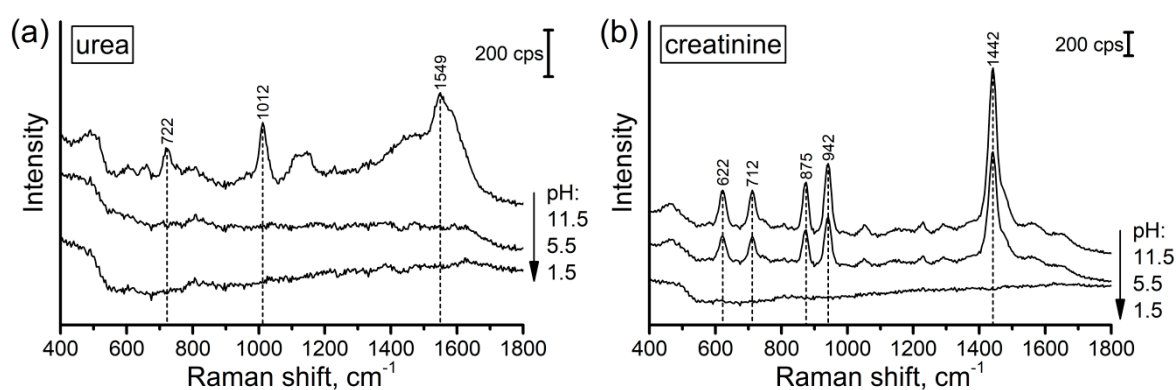

**Figure S1.** SERS spectra of (a) urea (1000 μg/mL) and (b) creatinine (2 μg/mL) aqueous solutions at different pH values.

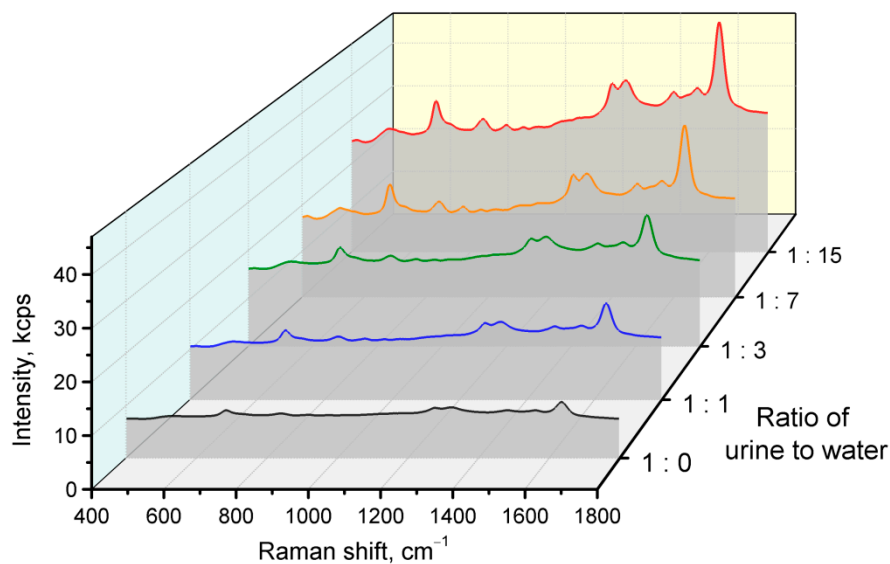

**Figure S2.** An influence of urine dilution on SERS signals of the pure urine with acidic pH (1.5).

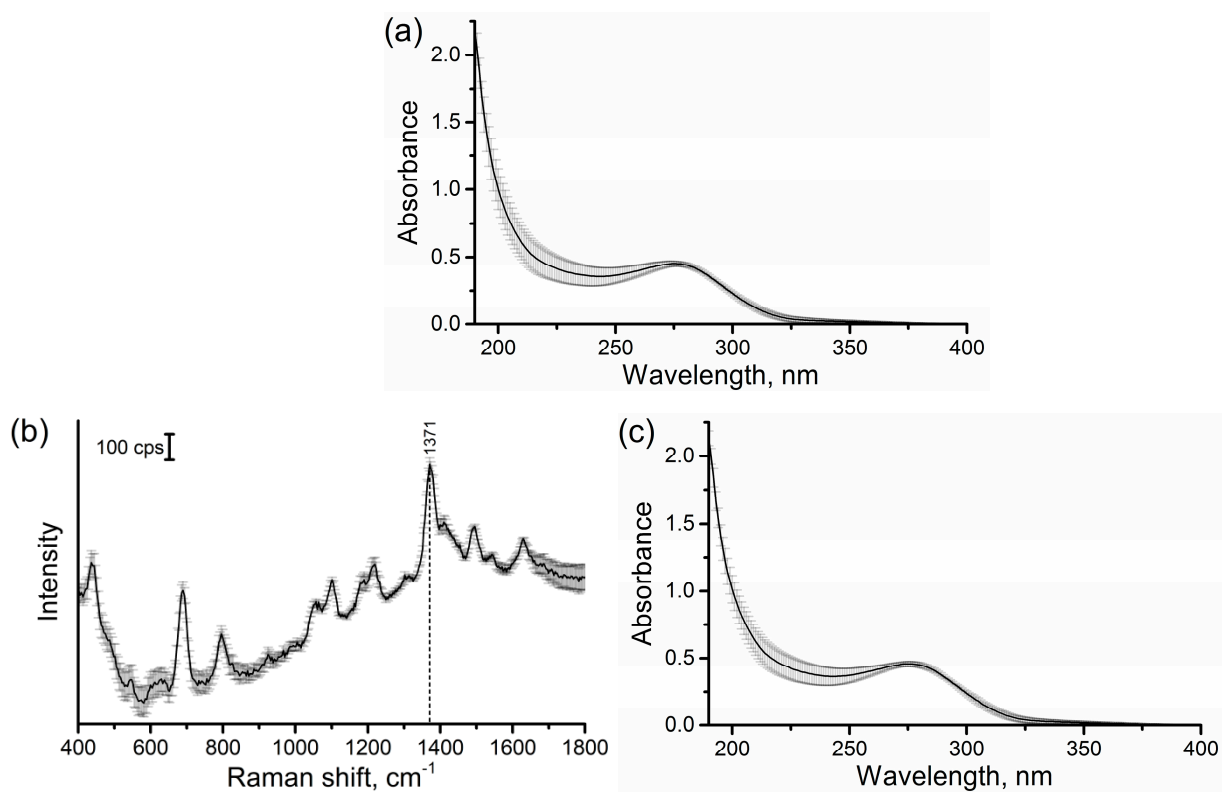

**Figure S3.** (a) Absorbance spectrum of CZL obtained during the study of temporal stability of AHG. (b,c) SERS and absorbance spectra of CZL obtained during the study of batch-to-batch reproducibility of AHG synthesis.

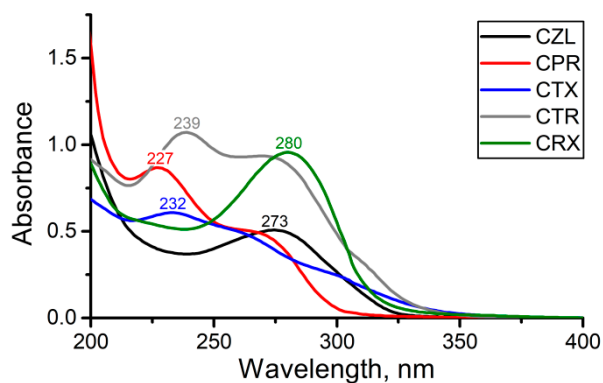

**Figure S4.** Profiles of absorbance spectra of the analytes (50 µg/mL)

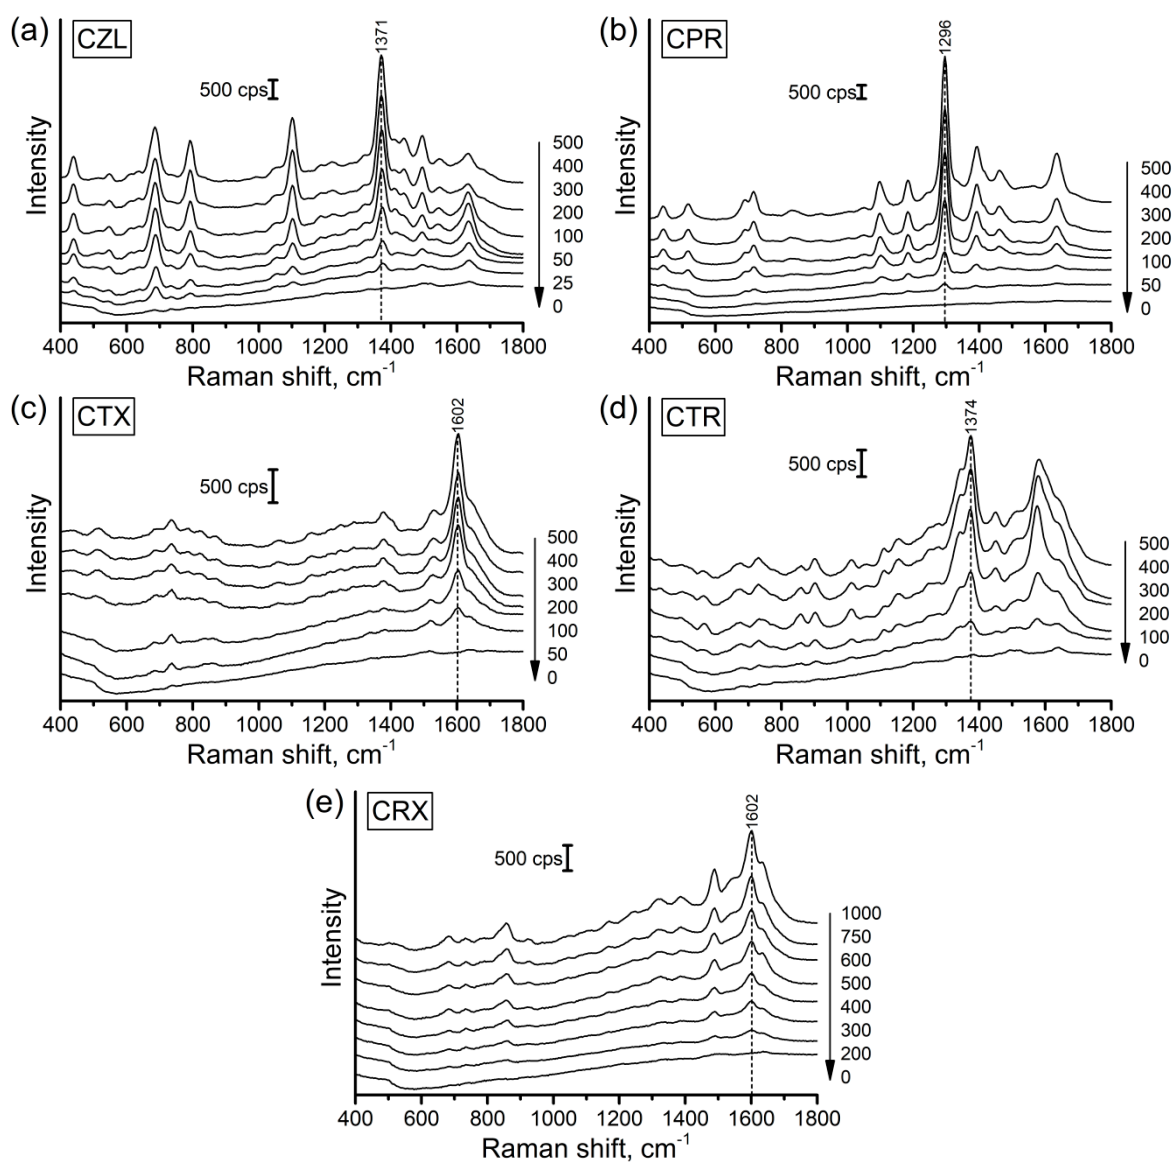

**Figure S5.** SERS spectra of the spiked urine samples after pretreatment with AHG and pH adjusting to 1.5. Marked bands were used to plot calibration curves (Figure 4 in the main text).

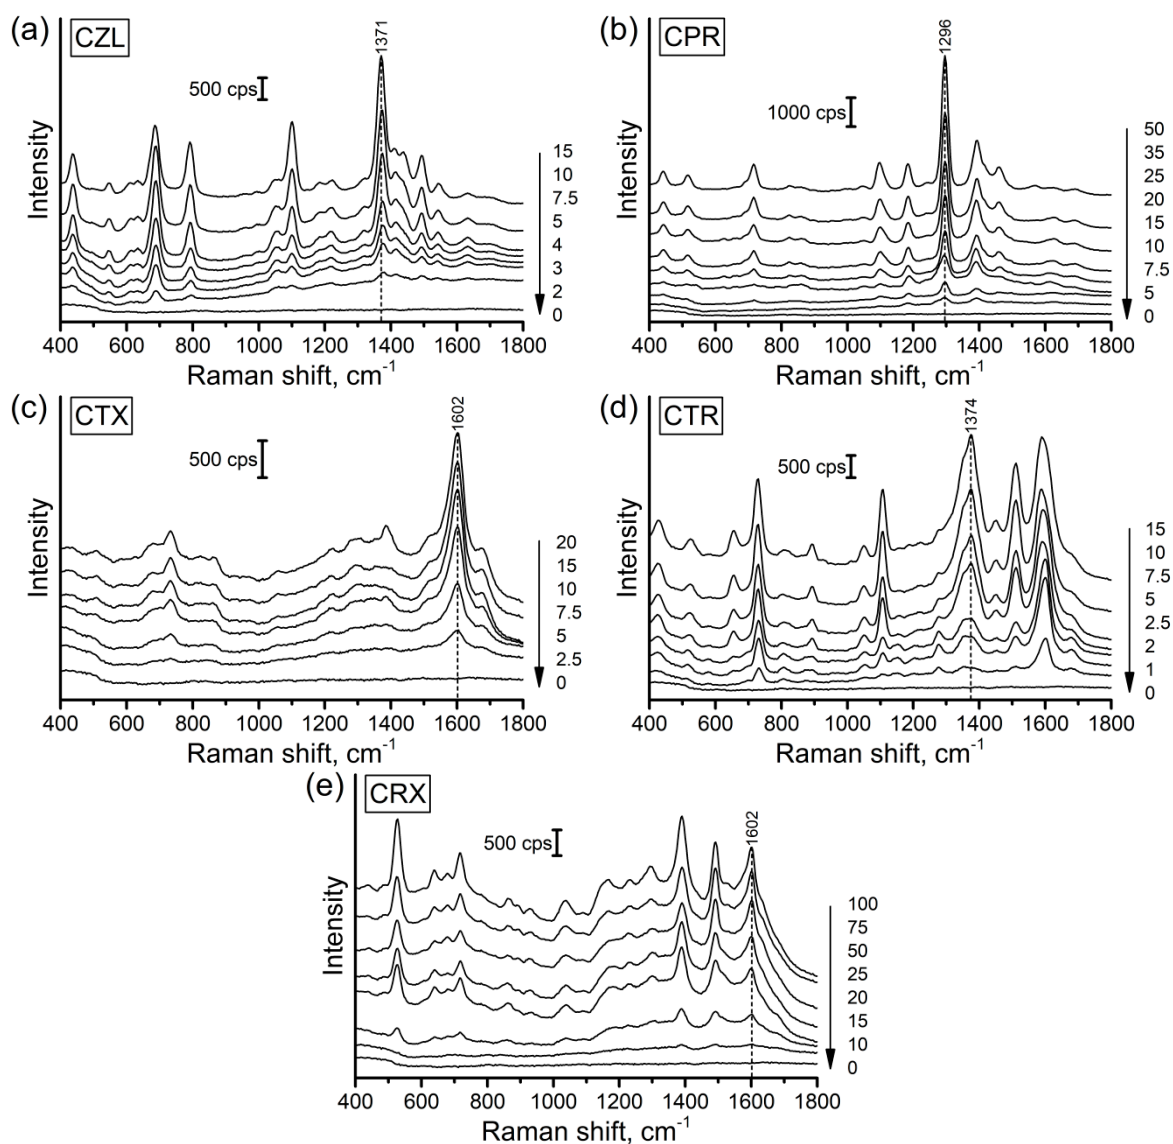

**Figure S6.** SERS spectra of the pure analytes solutions. Marked bands were used for plotting calibration curves (Figure S7).

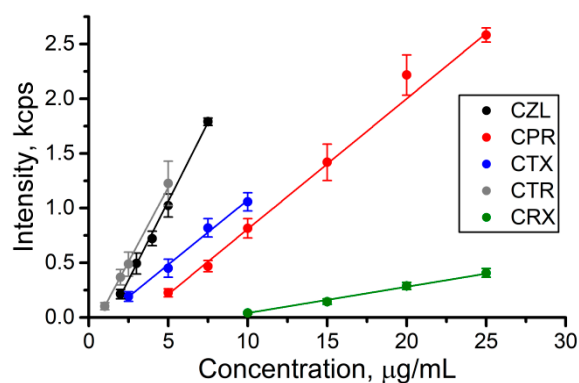

**Figure S7.** Linear parts of the calibration curves obtained using registered SERS spectra of the pure analyte solutions (Figure S6).

**Table S3.** The equations of calibration curves/plots obtained by registration of SERS signals of analyte solutions in pure water and the urine sample spiked by the analytes.  $I_{\text{SERS}}$ ,  $C$ , and  $\sigma$  are the intensity of SERS signal, the analyte concentration, and the level of background signal, respectively. The intensity of SERS and background signals is measured in counts per second (cps).

| Analyte | Pure water                                        | $\sigma$ | Spiked urine                                                  |                                                  |          |
|---------|---------------------------------------------------|----------|---------------------------------------------------------------|--------------------------------------------------|----------|
|         |                                                   |          | Whole range                                                   | Linear range                                     | $\sigma$ |
| CZL     | $I_{\text{SERS}} = 288 C - 378$<br>$R^2 = 0.999$  | 10       | $I_{\text{SERS}} = -0.007 C^2 + 8.6 C + 30$<br>$R^2 = 0.999$  | $I_{\text{SERS}} = 7.4 C + 66$<br>$R^2 = 0.994$  | 20       |
| CPR     | $I_{\text{SERS}} = 119 C - 385$<br>$R^2 = 0.992$  | 10       | $I_{\text{SERS}} = -0.009 C^2 + 15 C - 479$<br>$R^2 = 0.999$  | $I_{\text{SERS}} = 13 C - 362$<br>$R^2 = 0.999$  | 22       |
| CTX     | $I_{\text{SERS}} = 118 C - 107$<br>$R^2 = 0.996$  | 13       | $I_{\text{SERS}} = -0.005 C^2 + 4.4 C + 68$<br>$R^2 = 0.994$  | $I_{\text{SERS}} = 3.6 C + 97$<br>$R^2 = 0.991$  | 22       |
| CTR     | $I_{\text{SERS}} = 272 C - 171$<br>$R^2 = 0.998$  | 11       | $I_{\text{SERS}} = -0.006 C^2 + 7.0 C - 409$<br>$R^2 = 0.995$ | $I_{\text{SERS}} = 5.0 C - 266$<br>$R^2 = 0.999$ | 20       |
| CRX     | $I_{\text{SERS}} = 24.0 C - 199$<br>$R^2 = 0.996$ | 11       | $I_{\text{SERS}} = 0.99 C - 74$<br>$R^2 = 0.999$              | $I_{\text{SERS}} = 1.0 C - 74$<br>$R^2 = 0.999$  | 20       |
